# Supplementary material
Source: publisher figshare collection journal article supplement (https://acs.figshare.com/ndownloader/files/12754541)
Supplement: Supplementary file 1 [file 12754541]

## **Metal Oxide Based Hydroelectric Cell for Electricity Generation by Water Molecule**

### **Dissociation without Electrolyte/Acid**

**R. K. Kotnala<sup>1\*</sup>, Rekha Gupta<sup>1</sup>, Abha Shukla<sup>1</sup>, Shipra Jain<sup>1</sup>, Anurag Gaur<sup>2</sup>, Jyoti Shah<sup>1</sup>**

<sup>1</sup>CSIR-National Physical Laboratory, New Delhi 110012, India

<sup>2</sup> National Institute of Technology, Kurukshetra 136119, India

\*Corresponding Author

Fax: 91-11-45609310; Phone: 91-11-45608599/8266

E-mail: [rkotnala@gmail.com](mailto:rkotnala@gmail.com)

### **Surface Morphology of metal Oxide HECs**

The grain size distribution as well as mesopore formation has been estimated by SEM images. Smallest average grain size ~ 65 nm with nanopores of average 40 nm size has been observed in MgO, whereas increased grain size formation is found in SnO<sub>2</sub>, TiO<sub>2</sub>, ZnO, Al<sub>2</sub>O<sub>3</sub> and SiO<sub>2</sub> respectively. Agglomeration of small grains with average grain size distribution ~ 200 nm has been found in SnO<sub>2</sub> while grain size ~135 nm is observed in TiO<sub>2</sub>. The pore size distribution ~ 150 nm with some large open pores has been recorded in SnO<sub>2</sub> and small mesopores ~ 125nm are observed in TiO<sub>2</sub>. Uniform grain size ~ 340 nm has been observed in ZnO along with homogeneous mesopore formation of the order of 150 nm. On the other hand, large island like non uniform grain formation has been detected in Al<sub>2</sub>O<sub>3</sub>. Bimodal grain size distribution of average grain size ~ 400 nm with large open pores and interstices have been recorded in Al<sub>2</sub>O<sub>3</sub>. Non uniform grain size distribution with appearance of large and small clusters are found in SiO<sub>2</sub>. The average grain size has been calculated ~ 500 nm and pores are in ~ 280 nm size in SiO<sub>2</sub>.

**Supplementary Table S1: Calculation of chemidissociated ions at the surface of metal oxides by inceptive current measurements:**

Introducing few drops of water molecules results into initial chemidissociation of water molecules at defect and vacancy sites present at metal oxide surface. The surface current generated due to flow  $H^+ / OH^-$  ions between two silver electrodes at surface was measured by two probe method. Initial number of chemidissociated ions were calculated by the formula  $I = ne/2$  where I is the initial current produced due to water dissociation, n is the no. of ions generated and e is electric charge. The calculated value of number of chemidissociated ions has been listed in Table S1:

| <b>Name of metal<br/>oxide</b>     | <b>Surface current<br/>density<br/>(<math>\mu A/cm^2</math>)</b> | <b>No. of chemidissociated ions</b> |
|------------------------------------|------------------------------------------------------------------|-------------------------------------|
| <b>SnO<sub>2</sub></b>             | 0.790                                                            | 9.8E12                              |
| <b>Al<sub>2</sub>O<sub>3</sub></b> | 0.587                                                            | 7.2E12                              |
| <b>ZnO</b>                         | 0.620                                                            | 7.7E12                              |
| <b>TiO<sub>2</sub></b>             | 0.142                                                            | 1.7E12                              |
| <b>MgO</b>                         | 0.119                                                            | 1.48E12                             |
| <b>SiO<sub>2</sub></b>             | 0.130                                                            | 2.1E12                              |

**Supplementary Table S2: Change of pH of DI water (20 ml) with time by adding fixed amount 1gm of metal oxides.**

For each oxide, 1 gm pellet was poured in 20 ml deionized water and subsequent change in pH was monitored for fixed time 60 sec as depicted in Table1. It has been observed that SnO<sub>2</sub> enhances the pH of water maximum from 6.5 to 9.37 compared to other oxides due to highest rate of dissociation of water molecules. The least change in pH has been observed for TiO<sub>2</sub> ~ 6.5 to 6.62 due to slowest rate of water dissociation by TiO<sub>2</sub>.

| Sample                         | SnO <sub>2</sub> | Al <sub>2</sub> O <sub>3</sub> | ZnO      | TiO <sub>2</sub> | MgO       | SiO <sub>2</sub> |
|--------------------------------|------------------|--------------------------------|----------|------------------|-----------|------------------|
| Change in pH<br><br>(DI water) | 6.5-9.37         | 6.5 -8.41                      | 6.5-7.00 | 6.5-6.62         | 6.5 -7.33 | 6.5-7.00         |
| Time (Seconds)                 | 60               | 60                             | 60       | 60               | 60        | 60               |

**Supplementary Table S3: Calculated parameter for V/I polarization by non-linear curve fitting**

$$\text{Equation: } V_{out} = E_0 - [A \ln\left(\frac{I}{I_0}\right) - IR - m \ln(1 - \frac{I}{I_l})]$$

where  $E_0$  is reversible cell potential, A is Tafel slope,  $I_0$  is exchange current density, R is ohmic resistance for ion flow, m is constant and  $I_l$  is limiting current density

| Parameters | SnO <sub>2</sub> | Al <sub>2</sub> O <sub>3</sub> | ZnO     | TiO <sub>2</sub> | MgO     | SiO <sub>2</sub> |
|------------|------------------|--------------------------------|---------|------------------|---------|------------------|
| $E_0$      | 0.76             | 0.99                           | 0.91    | 0.96             | 0.99    | 1.00             |
| A          | 0.051            | 0.051                          | 0.013   | 0.033            | 0.015   | 0.017            |
| $I_0$      | 1.77E-6          | 5.13E-7                        | 6.00E-8 | 8.50E-8          | 1.47E-9 | 3.1E-10          |
| R          | 19.63            | 943.20                         | 335.07  | 284.85           | 1275.76 | 1075.9           |
| M          | 0.079            | 0.038                          | 0.610   | 0.017            | 0.344   | 0.636            |
| $I_l$      | 25.08            | 7.20                           | 6.42    | 2.37             | 1.52    | 1.96             |

**Supplementary Table S4: BET Surface area**

The pore size distribution and specific surface area of metal oxide pellets has been calculated by BET surface area analysis. Specific parameters including pore size, pore volume and specific surface area are given in Table S2(a) and Table S2(b):

**Table-S4 (a) Pore Size distribution**

| <b>Name<br/>(Metal Oxide)</b>      | <b>Total pore volume at P/Po = 0.99435</b>                   | <b>Pore Diameter (nm)</b>                                   |
|------------------------------------|--------------------------------------------------------------|-------------------------------------------------------------|
| <b>SnO<sub>2</sub></b>             | 8.564e-03 cc/g for pores smaller than<br>201.2 nm (Diameter) | <b>DA method</b> = 2.380 nm<br><b>BJH method</b> = 3.459 nm |
| <b>Al<sub>2</sub>O<sub>3</sub></b> | 1.640e-02 cc/g for pores smaller than<br>372.8 nm (Diameter) | <b>DA method</b> = 2.420 nm<br><b>BJH method</b> = 6.603 nm |
| <b>ZnO</b>                         | 2.01e-03 cc/g for pores smaller than 300<br>nm (Diameter)    | <b>DA method</b> = 2.480 nm<br><b>BJH method</b> = 3.442    |
| <b>TiO<sub>2</sub></b>             | 1.560e-02 cc/g for pores smaller than<br>263.4 nm (Diameter) | <b>DA method</b> = 3.068 nm<br><b>BJH method</b> = 3.073 nm |
| <b>MgO</b>                         | 4.533e-02 cc/g for pores smaller than<br>100 nm (Diameter)   | <b>DA method</b> = 3.769 nm<br><b>BJH method</b> = 3.107 nm |
| <b>SiO<sub>2</sub></b>             | 5.114e-03 cc/g for pores smaller than<br>252.6 nm (Diameter) | <b>DA method</b> = 5.670 nm<br><b>BJH method</b> = 3.064 nm |

**Table-S4(b) Surface Area Data**

| <b>Name<br/>(Metal Oxide)</b> | <b>BJH Method<br/>Cumulative<br/>Adsorption Surface<br/>Area (m<sup>2</sup>/g)</b> | <b>Multipoint BET<br/>(m<sup>2</sup>/g)</b> | <b>BJH Method<br/>Cumulative<br/>Desorption Surface<br/>Area (m<sup>2</sup>/g)</b> |
|-------------------------------|------------------------------------------------------------------------------------|---------------------------------------------|------------------------------------------------------------------------------------|
| <b>SnO<sub>2</sub></b>        | 2.531                                                                              | 4.978                                       | 2.337                                                                              |

|                                    |        |        |        |
|------------------------------------|--------|--------|--------|
| <b>Al<sub>2</sub>O<sub>3</sub></b> | 5.946  | 10.968 | 4.900  |
| <b>ZnO</b>                         | 1.056  | 1.699  | 0.754  |
| <b>TiO<sub>2</sub></b>             | 4.820  | 11.182 | 5.205  |
| <b>MgO</b>                         | 21.945 | 37.450 | 21.457 |
| <b>SiO<sub>2</sub></b>             | 1.365  | 3.279  | 1.349  |

**Supplementary Fig. S1 Dielectric loss v/s frequency plot of metal oxide HEC's in dry state:**

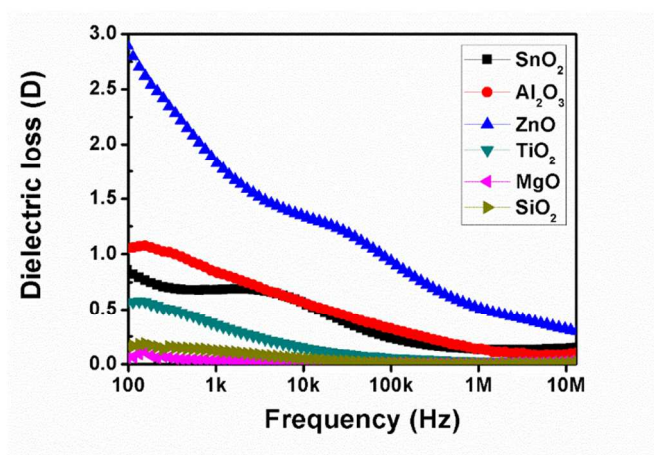

**Fig S1 Frequency dependence of dielectric loss of metal oxide HECs without any water (in dry state) where no response of grain boundary relaxation is visible.**

**Supplementary Fig. S2 Analytical complex impedance ( $-Z''$  v/s  $Z'$ ) fitting of wet metal oxide HECs with equivalent circuit**

In order to identify individual resistance contribution from electrode/material/interface to the charge flow in HEC, equivalent circuit analysis has been performed by using EIS analyzer under wet condition of cells. The equivalent circuit is shown in Fig.S2, where L represents inductance and R resistance of metallic elements of cell at very high frequencies.  $R_{ct}$  corresponds to charge transfer resistance of electrodes and  $R_b$  is accounted for bulk resistance of oxide material and it acts during cycling at the surface of anode. Constant phase element (CPE) has

been used in place of capacitor in order to compensate for non-ideal behavior of electrode due to surface roughness or porosity. Diffusion of ions is represented by a Warburg element (W).

Fig.S3 represents the analytical plots of wet metal oxide cells fitted with the equivalent circuit.

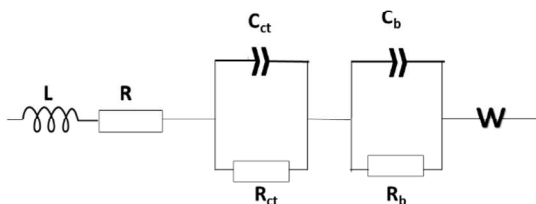

**Fig.S2** Equivalent circuit used for fitting the impedance data in wet metal oxide HECs.

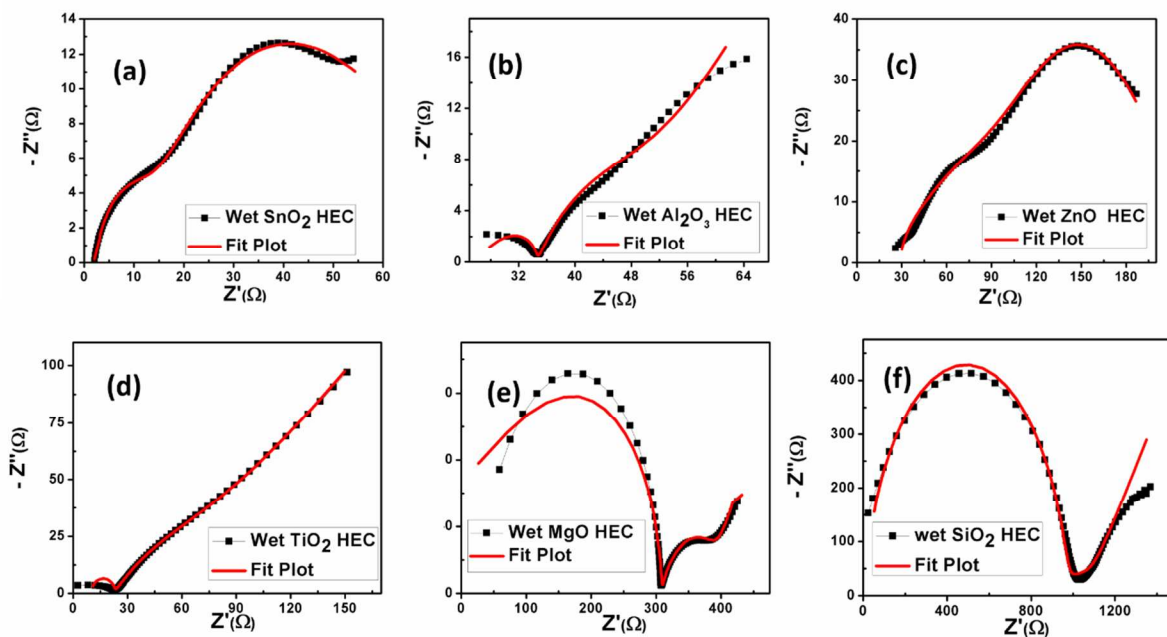

**Fig. S3** Analytical complex impedance ( $-Z''$  v/s  $Z'$ ) plots of wet metal oxide HECs fitted with equivalent circuit.
